# Supplementary material for: A human inferred germline antibody binds to an immunodominant epitope and neutralizes Zika virus
Source: PubMed Central journal article supplement (PMC5481143; doi:10.1371/journal.pntd.0005655), 2017-06-12
Supplement: pntd.0005655.s002.pdf [file pntd.0005655.s002.pdf]

**S1 Table. Gene usage and SHM levels in the plasmablast-derived mAbs.**

| mAb ID | ZIKV binding (Abs 450nm) | Human heavy chain V gene | Divergence (aa) from germline | CDRH3                   | Human light chain V gene | Divergence (aa) from germline | CDRL3          |
|--------|--------------------------|--------------------------|-------------------------------|-------------------------|--------------------------|-------------------------------|----------------|
| P1A02  | 0.01                     | IGHV5-51*01              | 4                             | CARHQPPQGDGTASHGMDVW    | IGKV1-39*01              | 7                             | CQQSFNRLWTF    |
| P1A04  | 0.00                     | IGHV1-18*01              | 10                            | CTKIDLHWDGVNGYDVSYPFENW | IGKV1-27*01              | 5                             | CQKYHSAPWTF    |
| P1B04  | 0.87                     | IGHV4-4*07               | 1                             | CARESGSLYMDVW           | IGKV3-11*01              | 1                             | CQQRSNWPLTF    |
| P1B05  | 0.05                     | IGHV3-23*04              | 1                             | CAKGMYYDFWGSNDAFDIW     | IGKV1-39*01              | 1                             | CQQSYSTPRTF    |
| P1B08  | 0.04                     | IGHV4-39*07              | 21                            | CARTGSRRWYGMDVW         | IGKV3-20*01              | 14                            | CQQYGSSVWAF    |
| P1B11  | 0.18                     | IGHV3-23*04              | 1                             | CAKSFYRDFWGSNDAFDIW     | IGKV1-39*01              | 1                             | CQQSYSTPRTF    |
| P1B12  | 0.33                     | IGHV4-34*01              | 0                             | CARRGGRCSTSCYPYYYYYMDVW | IGKV3-20*01              | 0                             | CQQYGSSPPLTF   |
| P1C03  | 0.01                     | IGHV4-4*07               | 19                            | CAKGGVTPGGGTSGTWFPNPW   | IGKV3-15*01              | 11                            | CQQYDHWPPYTF   |
| P1C10  | 0.21                     | IGHV3-23*04              | 0                             | CAKSFYRDFWGSNDAFDIW     | IGKV1-39*01              | 0                             | CQQSYSTPRTF    |
| P1F12  | 0.17                     | IGHV3-7*01               | 0                             | CAGNGWDDSSGYYRNYYYGMDVW | IGKV1-8*01               | 0                             | CQQYYSYPRTF    |
| P1H03  | 0.01                     | IGHV4-59*08              | 12                            | CVRHEIAGTTGAFDIW        | IGKV4-1*01               | 6                             | CQQYYSIPWTF    |
| P1D10  | 0.13                     | IGHV3-21*01              | 1                             | CARGRYGYSYALDYW         | IGLV6-57*02              | 3                             | CQSYDSSNHVVF   |
| P1E08  | 0.01                     | IGHV4-39*07              | 19                            | CARKAGYYDYW             | IGLV3-1*01               | 20                            | CQTGDTTTTVF    |
| P1F06  | 0.03                     | IGHV3-21*01              | 0                             | CARDFRGGYYGSGDAFDIW     | IGLV1-44*01              | 0                             | CAAWDDSLNGSYVF |
| P1G08  | 0.35                     | IGHV4-34*01              | 3                             | CARKRWQQLRRNWFDPW       | IGLV1-51*01              | 0                             | CGTWDSSLSAVVF  |
| P2B10  | 0.00                     | IGHV3-23*04              | 9                             | CAKVRVVVIVHDAFDVW       | IGKV1-16*02              | 7                             | CQQYSFYPLTF    |
| P2D03  | 0.01                     | IGHV3-23*04              | 17                            | CAKVVGLRLDDAFDIW        | IGKV1-5*03               | 8                             | CQQYLSYCTF     |
| P2E11  | 0.00                     | IGHV3-23*04              | 2                             | CAKDRGYDSSGYYSEAFDYW    | IGKV3-11*01              | 0                             | CQQRSNWSGITF   |
