# Supplementary material for: A human inferred germline antibody binds to an immunodominant epitope and neutralizes Zika virus
Source: PubMed Central journal article supplement (PMC5481143; doi:10.1371/journal.pntd.0005655), 2017-06-12
Supplement: pntd.0005655.s003.pdf [file pntd.0005655.s003.pdf]

| Sample <sup>a</sup> | Donors ID           | Sex | Age | Previous dengue <sup>b</sup> | Previous YF immunization <sup>b</sup> | Days post most recent exposure <sup>c</sup> | PIF12-ZIKV inhibition assay (Abs <sub>450</sub> ) |
|---------------------|---------------------|-----|-----|------------------------------|---------------------------------------|---------------------------------------------|---------------------------------------------------|
| ZIKV+               | hu0004 <sup>d</sup> | F   | 26  | No                           | No                                    | 46                                          | 0.04                                              |
|                     | 1302 <sup>e</sup>   | M   | 35  | No                           | Yes                                   | 110                                         | 0.62                                              |
|                     | 801                 | F   | 53  | Yes                          | Yes                                   | 19                                          | 0.04                                              |
|                     | 802                 | F   | 29  | No                           | Yes                                   | 19                                          | 0.05                                              |
|                     | 533                 | F   | 56  | Yes                          | Yes                                   | 159                                         | 0.03                                              |
|                     | 3002                | F   | 51  | No                           | Unk                                   | 19                                          | 0.04                                              |
|                     | 3004                | F   | 59  | Yes                          | Unk                                   | 19                                          | 0.03                                              |
|                     | 3012                | M   | 60  | Yes                          | Unk                                   | 17                                          | 0.05                                              |
|                     | 3013                | F   | 72  | Yes                          | Unk                                   | 16                                          | 0.03                                              |
| 3018                | F                   | 43  | No  | Unk                          | 15                                    | 0.04                                        |                                                   |
| DENV+ <sup>f</sup>  | 138                 | F   | 56  | Unk                          | No                                    | 33                                          | 0.34                                              |
|                     | 152                 | M   | 87  | No                           | Yes                                   | 30                                          | 0.15                                              |
|                     | 168                 | F   | 32  | No                           | No                                    | 32                                          | 0.32                                              |
|                     | 177                 | M   | 21  | No                           | No                                    | 29                                          | 0.18                                              |
|                     | 184                 | M   | 23  | No                           | No                                    | 29                                          | 0.26                                              |
|                     | 507                 | F   | 47  | No                           | No                                    | 33                                          | 0.28                                              |
|                     | 1235                | M   | 17  | No                           | No                                    | 30                                          | 0.18                                              |
|                     | 1208                | F   | 33  | No                           | Unk                                   | 30                                          | 0.25                                              |
|                     | 1248                | M   | 30  | No                           | Unk                                   | 31                                          | 0.36                                              |
|                     | 1252                | F   | 43  | No                           | Yes                                   | 31                                          | 0.19                                              |
|                     | 1280                | F   | 38  | No                           | No                                    | 34                                          | 0.29                                              |
| 1294                | F                   | 28  | No  | No                           | 30                                    | 0.29                                        |                                                   |
| YF vaccine          | FA2002              | M   | 34  | Unk                          | Yes                                   | 28                                          | 0.319                                             |
|                     | FA2004              | F   | 43  | No                           | Yes                                   | 28                                          | 0.393                                             |
|                     | FA2005              | M   | 30  | Unk                          | Yes                                   | 28                                          | 0.3315                                            |
|                     | FA7006              | M   | 73  | Unk                          | Yes                                   | 28                                          | 0.396                                             |
| Brazilian naïve     | 12                  | F   | 27  | Yes                          | Yes                                   | N/A                                         | 0.22                                              |
|                     | 515                 | F   | 18  | No                           | Yes                                   | N/A                                         | 0.293                                             |
|                     | 1255                | F   | 18  | No                           | Yes                                   | N/A                                         | 0.323                                             |
|                     | 1261                | F   | 15  | Unk                          | Unk                                   | N/A                                         | 0.4045                                            |
|                     | 1273                | M   | 62  | No                           | Yes                                   | N/A                                         | 0.395                                             |
| U.S. naïve          | hu0002              | M   | 28  | No                           | No                                    | N/A                                         | 0.57                                              |
|                     | Class 1             | F   | 20  | No                           | No                                    | N/A                                         | 0.3225                                            |
|                     | Class 2             | F   | 19  | No                           | No                                    | N/A                                         | 0.3125                                            |
|                     | Class 3             | F   | 23  | No                           | No                                    | N/A                                         | 0.4055                                            |
|                     | Class 4             | F   | 18  | No                           | No                                    | N/A                                         | 0.392                                             |
|                     | Class 5             | F   | 19  | No                           | No                                    | N/A                                         | 0.3885                                            |
|                     | Class 6             | F   | 21  | No                           | No                                    | N/A                                         | 0.2925                                            |
|                     | Class 7             | F   | 22  | No                           | No                                    | N/A                                         | 0.246                                             |
|                     | Class 8             | M   | 20  | No                           | No                                    | N/A                                         | 0.3035                                            |
|                     | Class 9             | M   | 19  | No                           | No                                    | N/A                                         | 0.316                                             |
|                     | Class 10            | M   | 20  | No                           | No                                    | N/A                                         | 0.3145                                            |
|                     | Class 11            | M   | 21  | No                           | No                                    | N/A                                         | 0.3945                                            |
|                     | Class 12            | F   | 27  | No                           | No                                    | N/A                                         | 0.344                                             |
|                     | Class 13            | F   | 24  | No                           | No                                    | N/A                                         | 0.2755                                            |
| Class 14            | M                   | 24  | No  | No                           | N/A                                   | 0.3225                                      |                                                   |

<sup>a</sup> ZIKV and DENV samples determined by RT-PCR; <sup>b</sup> Donor reported; <sup>c</sup> Days after the onset of symptoms or YF immunization; Unk, unknown; N/A, Not applicable. <sup>d</sup> Patient was not ZIKV RT-PCR positive, but had traveled to a ZIKV endemic area during the outbreak, had symptoms that matched ZIKV infection, and was found to have a plasma Neut<sub>50</sub> titer of 1:7,211 against ZIKV at time point collected. <sup>e</sup> Patient urine was positive by RT-PCR, but patient had no ZIKV-neutralizing serum activity in the sample tested. <sup>f</sup> All donors were positive for DENV1.
